# Supplementary material
Source: publisher figshare collection journal article supplement (https://acs.figshare.com/ndownloader/files/12149375)
Supplement: Supplementary file 1 [file 12149375]

Supporting Information

**Anti-Counterfeiting Quick Response Code with Emission Color of  
Invisible Metal-Organic Frameworks as Encoding Information**

Yong-Mei Wang<sup>†</sup>, Xue-Tao Tian<sup>†</sup>, Hui Zhang<sup>†</sup>, Zhong-Rui Yang<sup>†</sup>, Xue-Bo Yin<sup>\*,†,§</sup>

<sup>†</sup>State Key Laboratory of Medicinal Chemical Biology and Tianjin Key Laboratory of Biosensing and Molecular Recognition, College of Chemistry, Nankai University, Tianjin, 300071, China

<sup>§</sup>Collaborative Innovation Center of Chemical Science and Engineering (Tianjin), Nankai University, Tianjin, 300071, China

<sup>\*</sup>E-mail: xbyin@nankai.edu.cn; [Fax: +86-22-23503034](tel:+86-22-23503034)

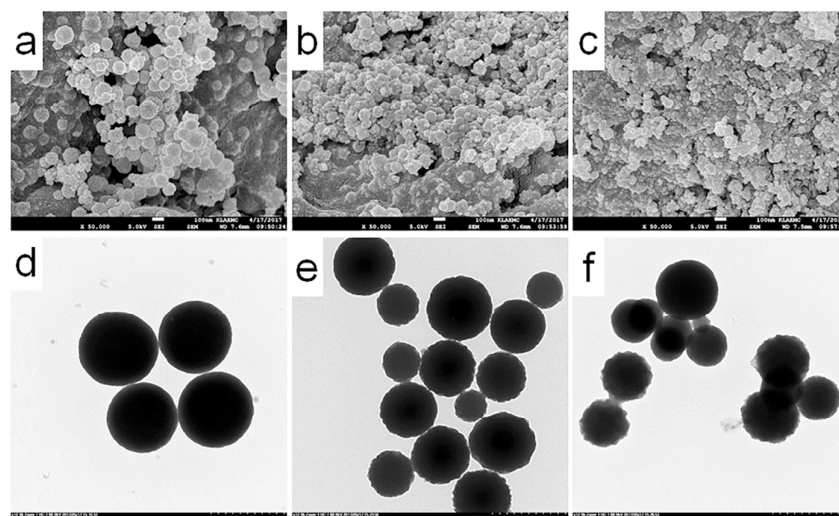

**Figure S1.** Ln-MOFs synthesized with (a) 5-bop and  $\text{Eu}^{3+}$ , (b) 5-bop and  $\text{Tb}^{3+}$ , (c) 5-bop and  $\text{Dy}^{3+}$ , (d) 1,3- $\text{H}_2\text{BDC}$  and  $\text{Eu}^{3+}$ , (e) 1,3- $\text{H}_2\text{BDC}$  and  $\text{Tb}^{3+}$ , (f) 1,3- $\text{H}_2\text{BDC}$  and  $\text{Dy}^{3+}$ .

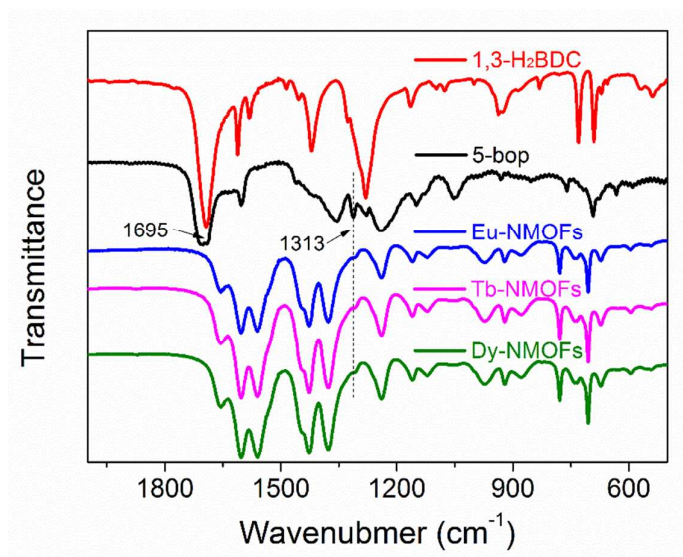

**Figure S2.** Fourier transform infrared spectra (FTIR) of 1,3- $\text{H}_2\text{BDC}$ , 5-bop, and Ln-MOFs.

**Table S1.** Crystallographic data collection and refinement of Eu-SMOFs.

| Compound                          | Eu-SMOFs                                                                                         |
|-----------------------------------|--------------------------------------------------------------------------------------------------|
| Chemical formula                  | C <sub>24</sub> H <sub>16</sub> Eu <sub>2</sub> O <sub>14</sub>                                  |
| Formula mass                      | 832.29 g/mol                                                                                     |
| Crystal system                    | Monoclinic                                                                                       |
| Space group                       | p 21/n                                                                                           |
| Unit cell dimensions              | a = 13.320(3) Å, α = 90.000°<br>b = 14.481(3) Å, β = 104.377(4)°<br>c = 13.459(3) Å, γ = 90.000° |
| Cell Volume                       | 2514.8 (8) Å <sup>3</sup>                                                                        |
| Z                                 | 4                                                                                                |
| Temperature                       | 113(2) K                                                                                         |
| Wavelength                        | 0.17073 Å                                                                                        |
| Crystal size                      | 0.12 × 0.18 × 0.2 mm <sup>3</sup>                                                                |
| Calculated Density                | 2.19817 g/cm <sup>-3</sup>                                                                       |
| F(000)                            | 1592.0                                                                                           |
| Absorption coefficient            | 5.017 mm <sup>-1</sup>                                                                           |
| R (int)                           | 0.030                                                                                            |
| Goodness of fit on F <sup>2</sup> | 1.0070                                                                                           |
| Limiting indices                  | -17 ≤ h ≤ 17, -18 ≤ k ≤ 17, -17 ≤ l ≤ 17                                                         |
| Final R indices I>2σ(I)           | R 1a = 0.0377, wR 2b = 0.0780                                                                    |
| R indices (all data)              | R 1 = 0.0477, wR 2 = 0.0842                                                                      |

**Table S2.** Crystallographic data collection and refinement of Tb-SMOFs.

| Compound                          | Tb-SMOFs                                                                                        |
|-----------------------------------|-------------------------------------------------------------------------------------------------|
| Chemical formula                  | C <sub>24</sub> H <sub>18</sub> Tb <sub>2</sub> O <sub>15</sub>                                 |
| Formula mass                      | 864.22g/mol                                                                                     |
| Crystal system                    | Monoclinic                                                                                      |
| Space group                       | p 21/n                                                                                          |
| Unit cell dimensions              | a = 10.537(2) Å, α = 90.000°<br>b = 14.162(3) Å, β = 97.364(5)°<br>c = 16.923(3) Å, γ = 90.000° |
| Cell Volume                       | 2506.3(9)Å <sup>3</sup>                                                                         |
| Z                                 | 4                                                                                               |
| Temperature                       | 113(2) K                                                                                        |
| Wavelength                        | 0.71073 Å                                                                                       |
| Crystal size                      | 0.12 × 0.18 × 0.2 mm <sup>3</sup>                                                               |
| Calculated Density                | 2.290 g/cm <sup>-3</sup>                                                                        |
| F(000)                            | 1648                                                                                            |
| Absorption coefficient            | 5.678 mm <sup>-1</sup>                                                                          |
| R (int)                           | 0.0386                                                                                          |
| Goodness of fit on F <sup>2</sup> | 0.984                                                                                           |
| Limiting indices                  | -13 ≤ h ≤ 13, -18 ≤ k ≤ 18, -21 ≤ l ≤ 21                                                        |
| Final R indices I>2sigma(I)       | R 1a = 0.0175, wR 2b = 0.0368                                                                   |
| R indices (all data)              | R 1 = 0.0151, wR 2 = 0.0363                                                                     |

**Table S3.** Crystallographic data collection and refinement of Dy-SMOFs.

| Compound                          | Dy-SMOFs                                                                                              |
|-----------------------------------|-------------------------------------------------------------------------------------------------------|
| Chemical formula                  | C <sub>48</sub> H <sub>36</sub> Dy <sub>4</sub> O <sub>30</sub>                                       |
| Formula mass                      | 1742.77 g/mol                                                                                         |
| Crystal system                    | Monoclinic                                                                                            |
| Space group                       | P 21/c                                                                                                |
| Unit cell dimensions              | a = 10.5772(19) Å    α = 90 °.<br>b = 14.206(3) Å    β = 97.363(7) °.<br>c = 16.976(4) Å    γ = 90 °. |
| Cell Volume                       | 2529.7(9) Å <sup>3</sup>                                                                              |
| Z                                 | 2                                                                                                     |
| Temperature                       | 133(2) K                                                                                              |
| Wavelength                        | 0.71073 Å                                                                                             |
| Crystal size                      | 0.18 x 0.10 x 0.10 mm                                                                                 |
| Calculated Density                | 2.288 g/m <sup>3</sup>                                                                                |
| F(000)                            | 1656                                                                                                  |
| Absorption coefficient            | 5.941 mm <sup>-1</sup>                                                                                |
| R (int)                           | 0.0293                                                                                                |
| Goodness of fit on F <sup>2</sup> | 1.015                                                                                                 |
| Limiting indices                  | -13 ≤ h ≤ 13, -18 ≤ k ≤ 18, -22 ≤ l ≤ 21                                                              |
| Final R indices I>2σ(I)           | R1 = 0.0114, wR2 = 0.0285                                                                             |
| R indices (all data)              | R1 = 0.0131, wR2 = 0.0288                                                                             |

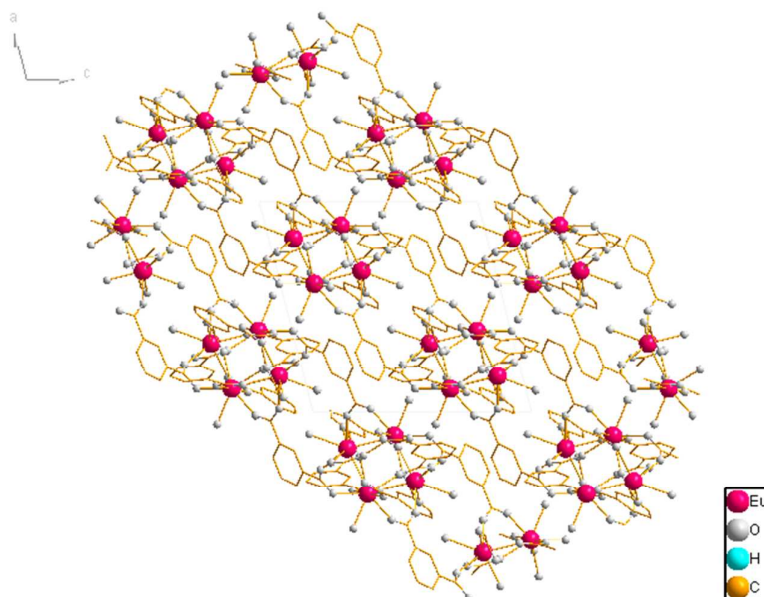

**Figure S3.** The 3D framework structure of Eu-SMOFs.

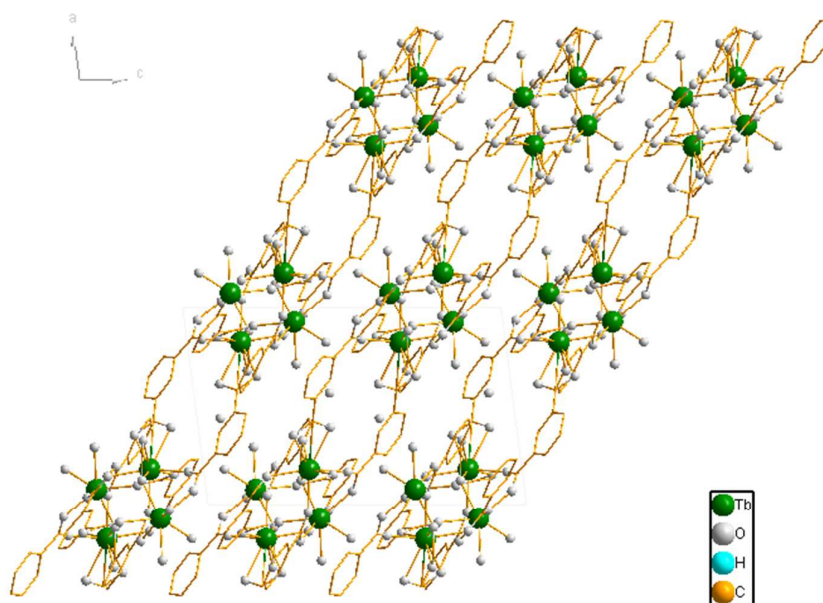

**Figure S4.** The 3D framework structure of Tb-SMOFs.

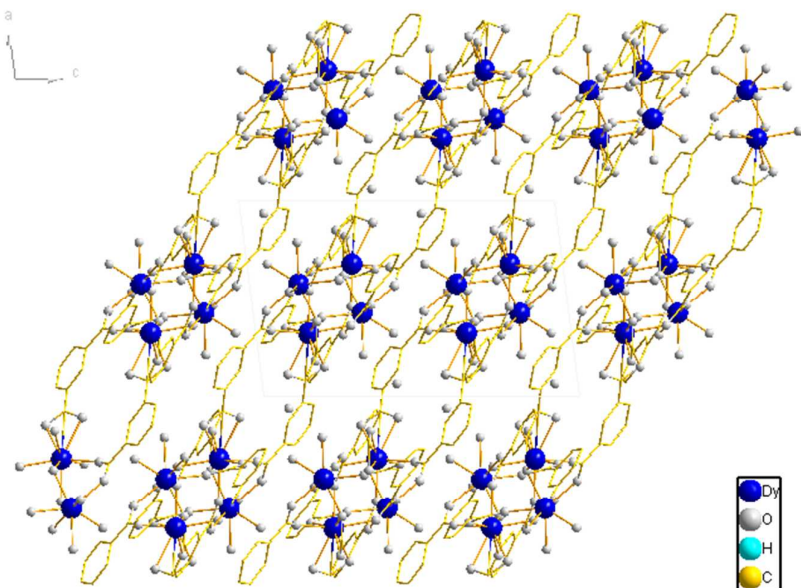

**Figure S5.** The 3D framework structure of Dy-SMOFs.

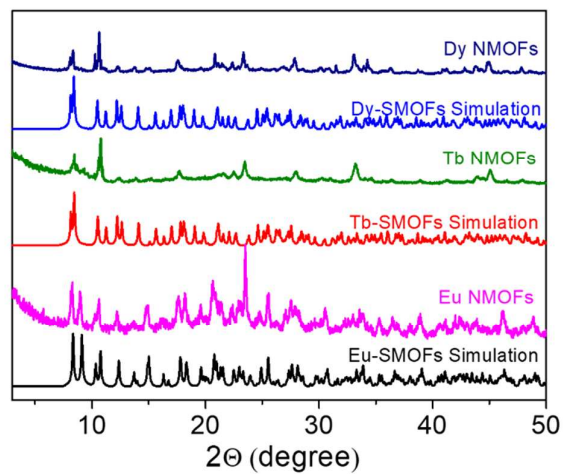

**Figure S6.** The powder diffraction pattern (PXRD) comparison of the nanosized Ln-NMOFs and simulation from  $\text{Eu}_2(1,3\text{-H}_2\text{BDC})_3(\text{H}_2\text{O})_2$ ,  $\text{Tb}_2(1,3\text{-H}_2\text{BDC})_3(\text{H}_2\text{O})_2 \cdot \text{H}_2\text{O}$  and  $\text{Dy}_4(1,3\text{-H}_2\text{BDC})_6(\text{H}_2\text{O})_4 \cdot (\text{H}_2\text{O})_2$  of CIF.

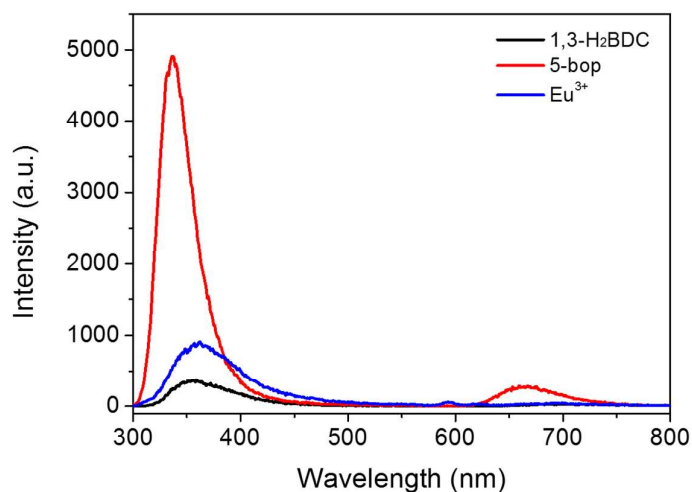

**Figure S7.** The fluorescence spectra of 1,3-H<sub>2</sub>BDC, 5-bop and Eu<sup>3+</sup>.

**Table S4.** The energy level S<sub>1</sub> and T<sub>1</sub> of 5-bop and 1,3-H<sub>2</sub>BDC.

|                        | S <sub>1</sub> (cm <sup>-1</sup> ) | T <sub>1</sub> (cm <sup>-1</sup> ) | Energy gap between T <sub>1</sub> and Ln <sup>3+</sup> ions (cm <sup>-1</sup> ) |                                                                          |                                                                            |
|------------------------|------------------------------------|------------------------------------|---------------------------------------------------------------------------------|--------------------------------------------------------------------------|----------------------------------------------------------------------------|
|                        |                                    |                                    | Eu <sup>3+</sup><br><sup>5</sup> D <sub>0</sub> , 18674 cm <sup>-1</sup>        | Tb <sup>3+</sup><br><sup>5</sup> D <sub>4</sub> , 20500 cm <sup>-1</sup> | Dy <sup>3+</sup><br><sup>4</sup> F <sub>2/9</sub> , 22000 cm <sup>-1</sup> |
| 5-bop                  | 35335                              | 23923                              | 5249                                                                            | 3423                                                                     | 1923                                                                       |
| 1,3-H <sub>2</sub> BDC | 35714                              | 22831                              | 4157                                                                            | 2331                                                                     | 831                                                                        |

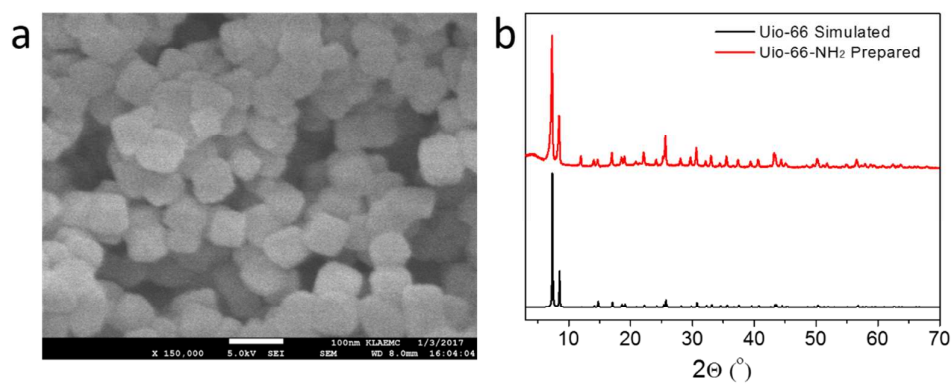

**Figure S8.** (a) Scanning electron microscope (SEM) image of Uio-66-NH<sub>2</sub>. (b) The powder diffraction pattern (PXRD) comparison of the nanoscale Uio-66-NH<sub>2</sub> and simulation from Uio-66 of CIF.



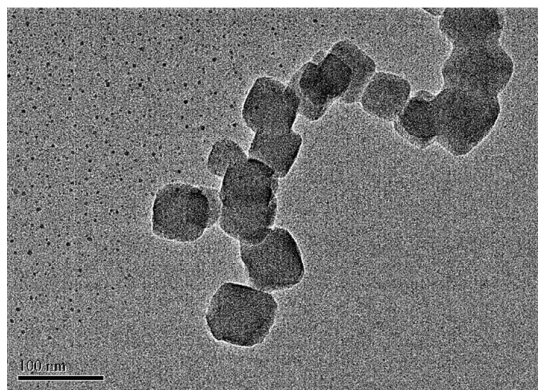

**Figure S9.** The TEM image of prepared UiO-66-NH<sub>2</sub>.

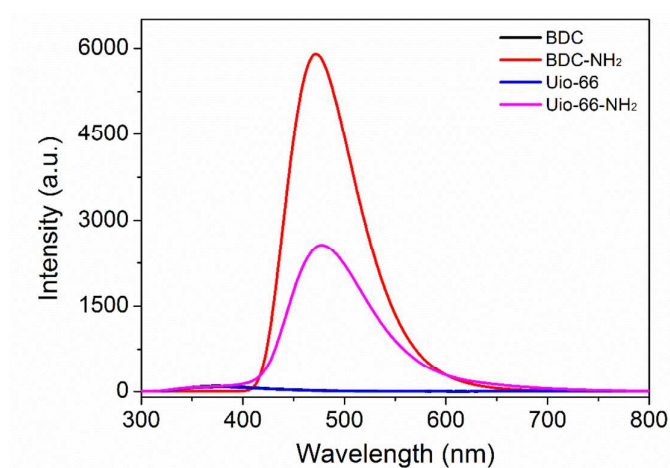

**Figure S10.** The fluorescence spectra of BDC, BDC-NH<sub>2</sub>, and UiO-66-NH<sub>2</sub>.

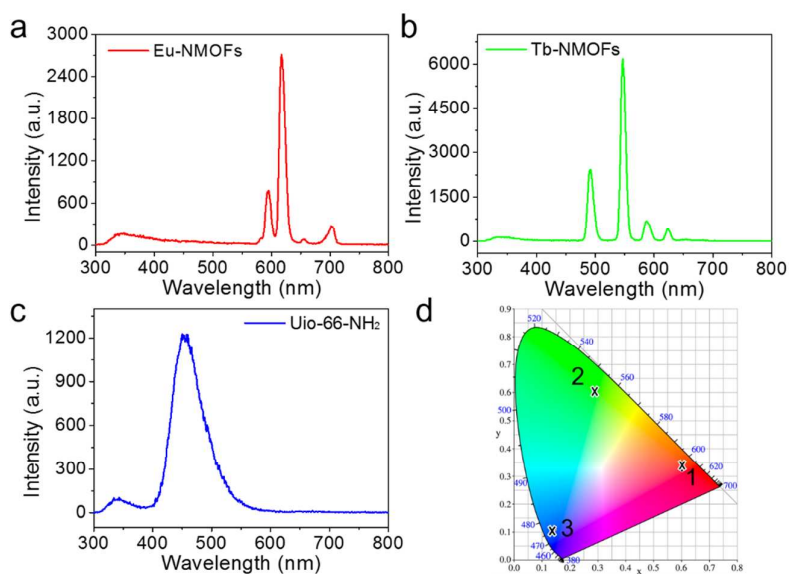

**Figure S11.** Luminescence spectrum of (a) Eu-NMOFs, (b) Tb-NMOFs, (c) UiO-66-NH<sub>2</sub> under 275 nm excitation, and (d) CIE chromaticity coordinates for luminescence of (1) Eu-NMOFs, (2) Tb-NMOFs, (3) UiO-66-NH<sub>2</sub>.

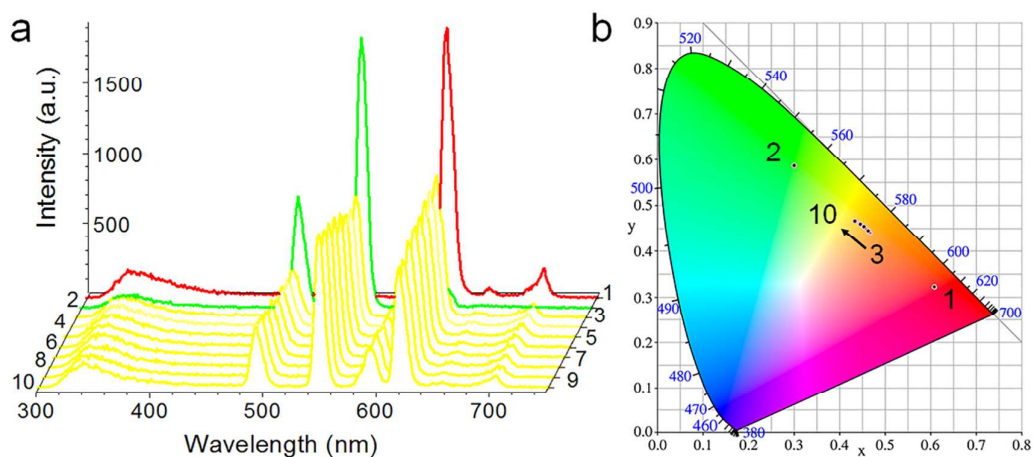

**Figure S12.** (a) Luminescence spectra of physically mixed Eu-NMOFs and Tb-NMOFs physically mixed with ratio of (1) 1:0, (2) 0:1, (3) 1:1, (4) 1:1.001, (5) 1:1.01, (6) 1:1.1, (7) 1:2, (8) 1:1.3, (9) 1:1.4, and (10) 1:1.5 under the excitation at 275-nm; (b) CIE chromaticity coordinates of the emissions of the mixed NMOFs. The labels from “1” to “10” corresponding to the samples listed in a.

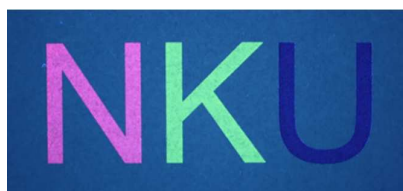

**Figure S13.** Image of the printed acronym of ‘Nankai University’ with the invisible RGB-emitting NMOF inks on paper under 275 nm UV light.

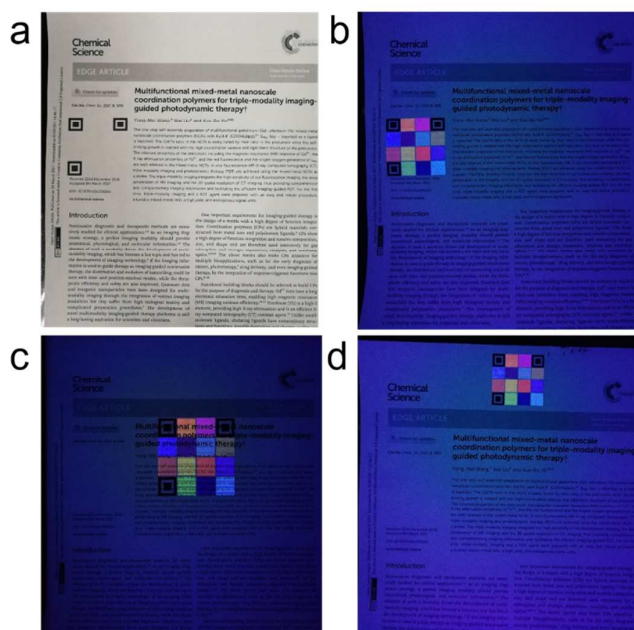

**Figure S14.** Images of the printed 4\*4 QR code on a piece of paper with printed documents under (a) daylight and (b-d) 275 nm UV light.

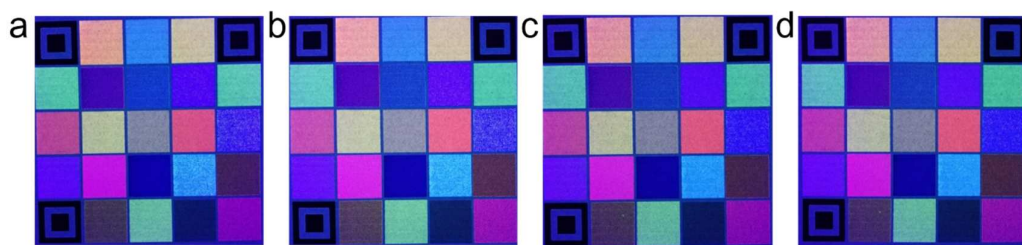

**Figure S15.** Images of the printed QR code patterns photographed (a) instantly, (b) one day, (c) one week, and (d) one month after printing under 275 nm UV light.
